# Supplementary material for: Synthesis and structural characterisation of group 10 metal(ii) gallyl complexes: analogies with platinum diboration catalysts?
Source: Royal Society of Chemistry journal article supplement (doi:10.1039/b715895e), 2008-01-01
Supplement: b715895e.pdf [file b715895e.pdf]

## Synthesis and Structural Characterisation of Group 10 Metal(II) Gallyl Complexes:

### Analogies with Platinum Diboration Catalysts?

Cameron Jones,\* David P. Mills, Richard P. Rose and Andreas Stasch

#### SUPPLEMENTARY MATERIAL

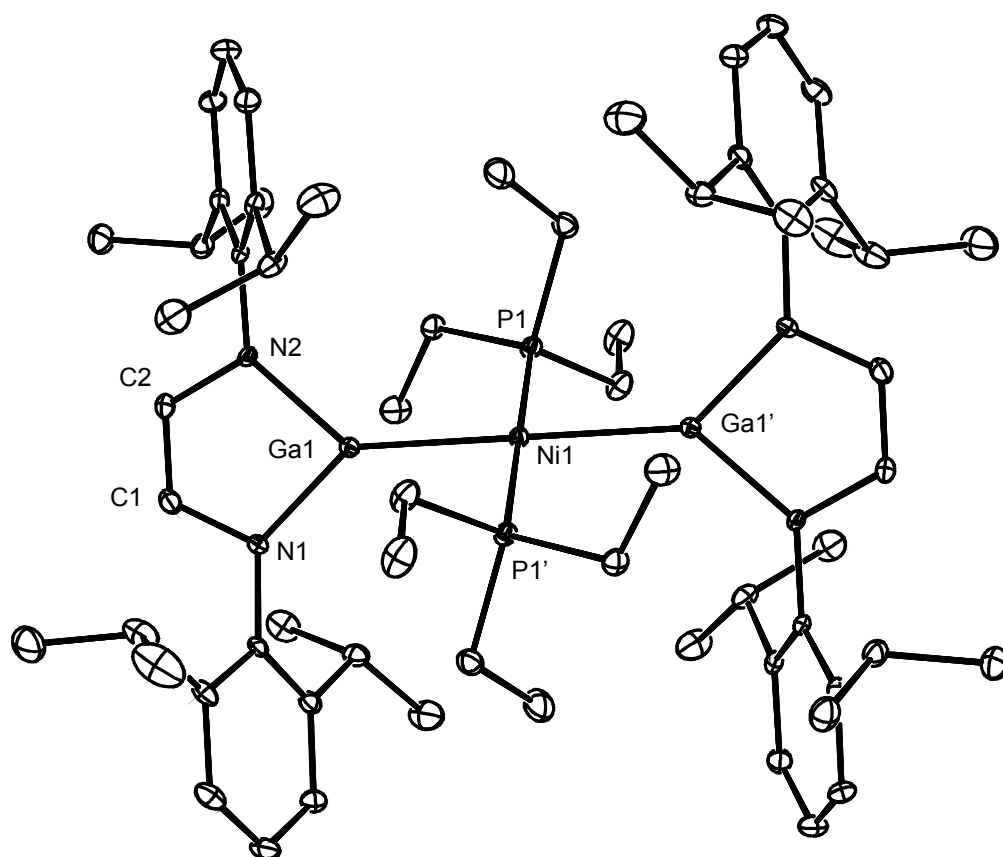

**Figure S1.** Molecular Structure of 7 (25% thermal ellipsoids are shown).

Symmetry operation:  $-x+1, -y+1, -z+1$ .

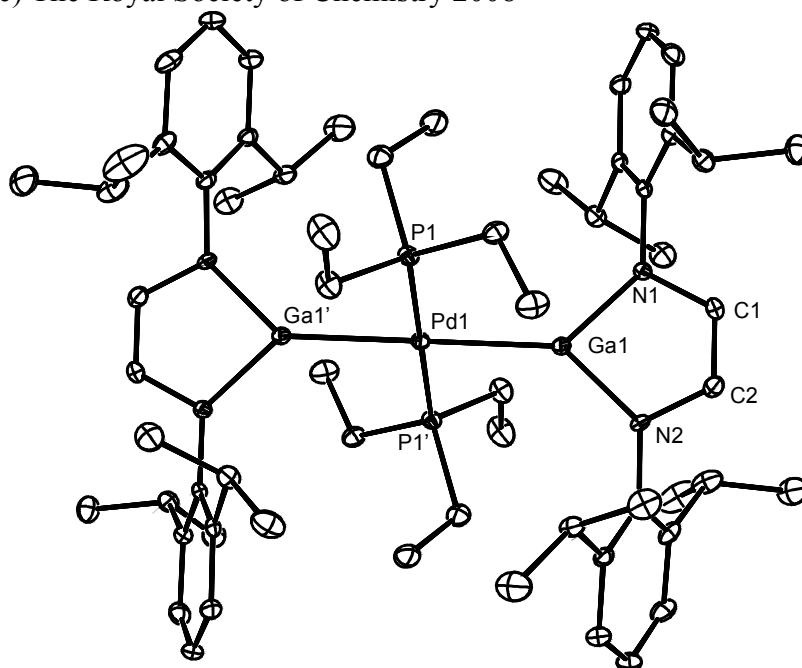

**Figure S2.** Molecular Structure of **8** (25% thermal ellipsoids are shown).

Symmetry operation:  $-x+1, -y+1, -z+1$ .

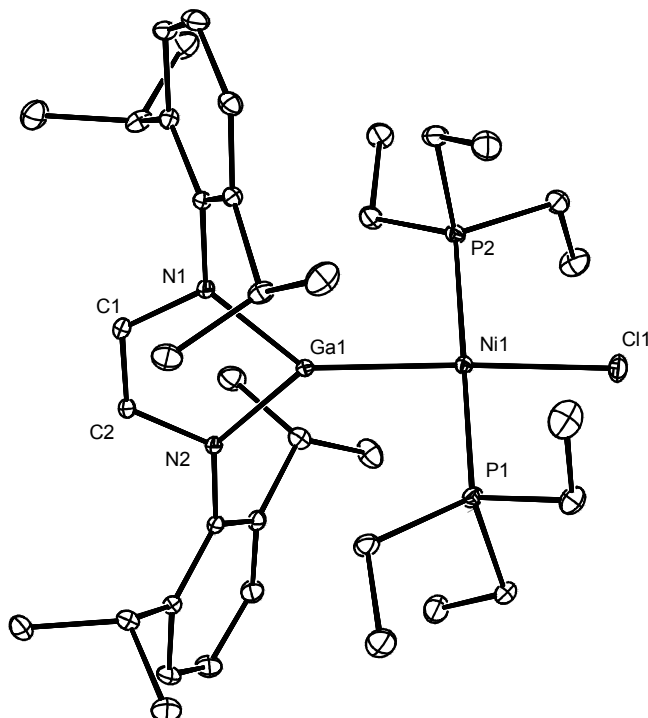

**Figure S3.** Molecular Structure of **10** (25% thermal ellipsoids are shown).

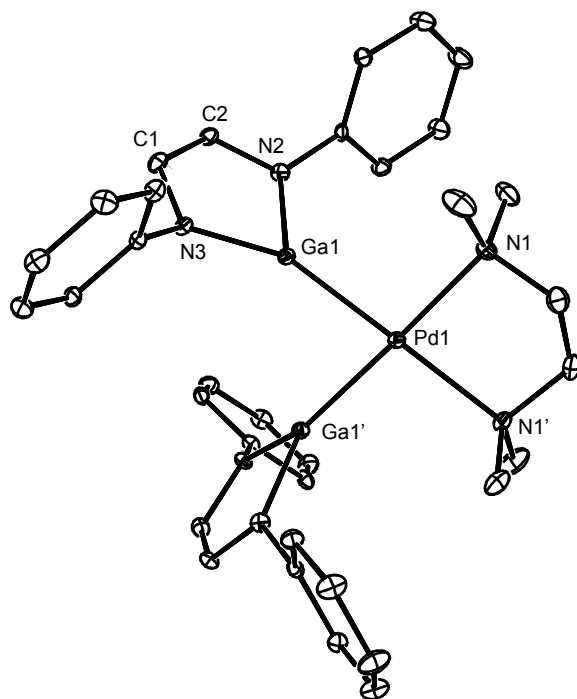

**Figure S4.** Molecular Structure of **15** (25% thermal ellipsoids are shown; isopropyl groups omitted for clarity). Symmetry operation:  $-x+1, y, -z+1/2$ .

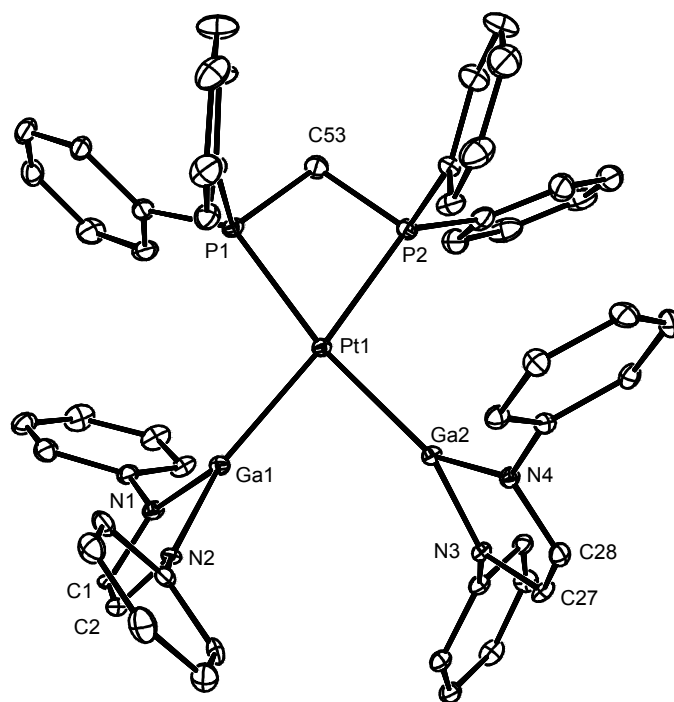

**Figure S5.** Molecular Structure of **17** (25% thermal ellipsoids are shown; isopropyl groups omitted for clarity).
